# Supplementary material for: Synthetic MRI, dynamic contrast-enhanced MRI combined with diffusion-weighted imaging for identifying molecular subtypes of breast cancer using machine learning models
Source: Research Square preprint supplement (doi:10.21203/rs.3.rs-5608203/v1), 2024-12-26
Supplement: Supplementary file 1 [file 4dcac64fca40de8092f90093.docx]

Table 1 Logistic analysis for characteristic parameters of DWI,DCE-MRI.

| Comparison | Variable | OR | 95% CI Lower | 95% CI Upper | p-value | Statistic | p-value |
| --- | --- | --- | --- | --- | --- | --- | --- |
| Label_1_vs_0 | ADC-Pertumor | 0.510510944 | 0.110987825 | 2.348198316 | 0.387835699 | 5177 | 0.368261528 |
| Label_2_vs_0 | ADC-Pertumor | 0.975719143 | 0.437223489 | 2.177439844 | 0.952142665 | 11453.5 | 0.551972849 |
| Label_3_vs_0 | ADC-Pertumor | 5.023845025 | 1.546861233 | 16.3162786 | 0.007236015 | 3639.5 | 0.009219739 |
| Label_4_vs_0 | ADC-Pertumor | 1.114864249 | 0.114066307 | 10.8964893 | 0.925520506 | 1864 | 0.818795626 |
| Label_1_vs_0 | ADC-Tumor | 2.85E-07 | 3.36E-09 | 2.42E-05 | 2.92E-11 | 8892 | ***p***＜0.001 |
| Label_2_vs_0 | ADC-Tumor | 1.36E-06 | 5.68E-08 | 3.28E-05 | 8.42E-17 | 21677 | ***p***＜0.001 |
| Label_3_vs_0 | ADC-Tumor | 9.93E-07 | 1.22E-08 | 8.11E-05 | 7.56E-10 | 8257 | ***p***＜0.001 |
| Label_4_vs_0 | ADC-Tumor | 4.52E-11 | 1.86E-15 | 1.09E-06 | 3.76E-06 | 3714 | ***p***＜0.001 |
| Label_1_vs_0 | BiRADS | 7.752206328 | 4.654435522 | 12.91170598 | 3.60E-15 | 874 | ***p***＜0.001 |
| Label_2_vs_0 | BiRADS | 18.30394351 | 9.716975812 | 34.47928188 | 2.30E-19 | 934 | ***p***＜0.001 |
| Label_3_vs_0 | BiRADS | 18.03845459 | 7.947503457 | 40.94189397 | 4.62E-12 | 384 | ***p***＜0.001 |
| Label_4_vs_0 | BiRADS | 13.42619059 | 5.292017612 | 34.06311297 | 4.56E-08 | 180 | ***p***＜0.001 |
| Label_1_vs_0 | enhancement | 0.896988486 | 0.616762933 | 1.304534207 | 0.569449585 | 4893 | 0.814351443 |
| Label_2_vs_0 | enhancement | 1.083163174 | 0.801792075 | 1.463275204 | 0.602689815 | 11280.5 | 0.381821898 |
| Label_3_vs_0 | enhancement | 0.891118581 | 0.610028904 | 1.301729016 | 0.551045725 | 4813 | 0.812376284 |
| Label_4_vs_0 | enhancement | 1.443139068 | 0.860120959 | 2.421345917 | 0.164748308 | 1566 | 0.121755949 |
| Label_1_vs_0 | maoci | 52.25 | 20.97712473 | 130.1447426 | 1.96E-17 | 1520 | ***p***＜0.001 |
| Label_2_vs_0 | maoci | 28.66101695 | 13.09369189 | 62.73661389 | 4.66E-17 | 5312 | ***p***＜0.001 |
| Label_3_vs_0 | maoci | 11.2972973 | 4.660803443 | 27.38346034 | 7.99E-08 | 3196 | ***p***＜0.001 |
| Label_4_vs_0 | maoci | 13.57142857 | 4.613942236 | 39.91893787 | 2.16E-06 | 1216 | ***p***＜0.001 |
| Label_1_vs_0 | size | 0.851838163 | 0.73104399 | 0.992591781 | 0.0398533 | 4588 | 0.614439578 |
| Label_2_vs_0 | size | 0.759492529 | 0.66249583 | 0.870690614 | 7.94E-05 | 13068.5 | 0.143029643 |
| Label_3_vs_0 | size | 0.810509649 | 0.683888254 | 0.9605749 | 0.015347854 | 4839 | 0.775443848 |
| Label_4_vs_0 | size | 0.931564482 | 0.775517893 | 1.119010136 | 0.448535409 | 1595 | 0.181592139 |
| Label_1_vs_0 | TIC | 9.249379107 | 4.615976544 | 18.53367604 | 3.54E-10 | 1960 | ***p***＜0.001 |
| Label_2_vs_0 | TIC | 15.38002403 | 7.613623846 | 31.06866636 | 2.57E-14 | 5145 | ***p***＜0.001 |
| Label_3_vs_0 | TIC | 9.777504778 | 4.452093906 | 21.47295221 | 1.34E-08 | 2140 | ***p***＜0.001 |
| Label_4_vs_0 | TIC | 7.671687814 | 2.869085063 | 20.51343638 | 4.90E-05 | 885 | ***p***＜0.001 |

Note. Luminal A group was presented as lable 0， Luminal B group was presented as lable 1，HER2-enriched group was presented as lable 2, TN group was presented as lable 3, The normal control group was represented as lable 4.

Table 2 ANOVA analysis for characteristic parameters of DWI, DCE-MRI.

| Variable | F-statistic | p-value |
| --- | --- | --- |
| size | 7.268234329 | 1.12E-05 |
| number | 12.59787795 | 1.01E-09 |
| BiRADS | 201.7999099 | 1.05E-98 |
| enhancement | 1.226630736 | 0.298698953 |
| maoci | 48.22221331 | 1.06E-33 |
| TIC | 48.23630432 | 1.01E-33 |
| ADC-Tumor | 90.57649979 | 2.43E-56 |
| ADC-Pertumor | 2.067340924 | 0.084110971 |
| ADC-Ratio | 165.3062344 | 9.95E-87 |

Table 3 Logistic analysis for characteristic parameters of SyMRI.

| Variable | Comparison | OR | 95% CI Lower | 95% CI Upper | p-value | Statistic | p-value |
| --- | --- | --- | --- | --- | --- | --- | --- |
| PD-Delta | Label_1_vs_0 | 1.021 | 0.997 | 1.045 | 0.089 | 4263 | 0.201840655 |
| PD-Delta | Label_2_vs_0 | 1.012 | 0.996 | 1.03 | 0.151 | 11650.5 | 0.888421684 |
| PD-Delta | Label_3_vs_0 | 1.011 | 0.989 | 1.034 | 0.329 | 4750 | 0.943454775 |
| PD-Delta | Label_4_vs_0 | 1.009 | 0.979 | 1.04 | 0.568 | 1900 | 0.936099659 |
| T1-Delta | Label_1_vs_0 | 0.998 | 0.997 | 0.999 | 0 | 6483 | 6.27E-05 |
| T1-Delta | Label_2_vs_0 | 1 | 0.999 | 1.001 | 0.932 | 12222 | 0.552509752 |
| T1-Delta | Label_3_vs_0 | 1 | 1 | 1.001 | 0.362 | 4533 | 0.653886863 |
| T1-Delta | Label_4_vs_0 | 1 | 0.998 | 1.001 | 0.524 | 2004 | 0.731411258 |
| T2-Delta_ | Label_1_vs_0 | 0.975 | 0.949 | 1.002 | 0.073 | 5847 | 0.012772238 |
| T2-Delta | Label_2_vs_0 | 1.012 | 0.99 | 1.033 | 0.285 | 11062.5 | 0.369566113 |
| T2-Delta | Label_3_vs_0 | 1.022 | 0.995 | 1.048 | 0.106 | 4027.5 | 0.096104975 |
| T2-Delta | Label_4_vs_0 | 1.008 | 0.973 | 1.044 | 0.664 | 1780 | 0.566247995 |
| PD-Ratio | Label_1_vs_0 | 4.60E+11 | 110353.412 | 1.92E+18 | 0.001 | 144 | ***p*＜**0.001 |
| PD-Ratio | Label_2_vs_0 | 2569719.934 | 63795.069 | 103510516.1 | 0 | 485 | ***p*＜**0.001 |
| PD-Ratio | Label_3_vs_0 | 6.58E+11 | 2275797.243 | 1.90E+17 | 0 | 88 | ***p*＜**0.001 |
| PD-Ratio | Label_4_vs_0 | 1.54E+29 | 45.311 | 5.21E+56 | 0.038 | 24 | ***p*＜**0.001 |
| PD-Gd | Label_1_vs_0 | 0.963 | 0.947 | 0.98 | 0 | 6954 | ***p*＜**0.001 |
| PD-Gd | Label_2_vs_0 | 0.97 | 0.957 | 0.983 | 0 | 15961 | ***p*＜**0.001 |
| PD-Gd | Label_3_vs_0 | 0.982 | 0.967 | 0.997 | 0.018 | 5756 | **0.012** |
| PD-Gd | Label_4_vs_0 | 0.97 | 0.949 | 0.991 | 0.006 | 2673 | **0.001973363** |
| T1-Gd | Label_1_vs_0 | 1.005 | 1.003 | 1.007 | 0 | 2472 | ***p*＜**0.001 |
| T1-Gd | Label_2_vs_0 | 1.003 | 1.001 | 1.005 | 0.001 | 7783 | ***p*＜**0.001 |
| T1-Gd | Label_3_vs_0 | 1.001 | 0.999 | 1.004 | 0.336 | 3703 | **0.014515369** |
| T1-Gd | Label_4_vs_0 | 1.003 | 1 | 1.006 | 0.063 | 1186 | **0.00255965** |
| T2-Gd | Label_1_vs_0 | 0.906 | 0.879 | 0.934 | 0 | 7770 | ***p*＜**0.001 |
| T2-Gd | Label_2_vs_0 | 0.919 | 0.896 | 0.943 | 0 | 17749.5 | ***p*＜**0.001 |
| T2-Gd | Label_3_vs_0 | 0.951 | 0.924 | 0.978 | 0 | 6509 | ***p*＜**0.001 |
| T2-Gd | Label_4_vs_0 | 0.957 | 0.924 | 0.992 | 0.017 | 2647 | **0.002803929** |
| PD-Pre | Label_1_vs_0 | 0.956 | 0.935 | 0.977 | 0 | 6954 | 3.00E-07 |
| PD-Pre | Label_2_vs_0 | 0.958 | 0.941 | 0.975 | 0 | 15424 | 2.41E-06 |
| PD-Pre | Label_3_vs_0 | 0.976 | 0.956 | 0.996 | 0.021 | 5434.5 | 0.086030002 |
| PD-Pre | Label_4_vs_0 | 0.95 | 0.92 | 0.98 | 0.001 | 2713 | 0.001120661 |
| T1-Pre | Label_1_vs_0 | 0.999 | 0.998 | 1 | 0.017 | 5880 | 0.010228296 |
| T1-Pre | Label_2_vs_0 | 1 | 1 | 1.001 | 0.187 | 10355 | 0.070638081 |
| T1-Pre | Label_3_vs_0 | 1.001 | 1 | 1.001 | 0.196 | 3656 | 0.010559664 |
| T1-Pre | Label_4_vs_0 | 1 | 0.999 | 1.001 | 0.985 | 1837 | 0.734474934 |
| T2-Pre | Label_1_vs_0 | 0.942 | 0.922 | 0.963 | 0 | 7422 | 4.44E-10 |
| T2-Pre | Label_2_vs_0 | 0.971 | 0.957 | 0.986 | 0 | 14958.5 | 3.84E-05 |
| T2-Pre | Label_3_vs_0 | 0.989 | 0.973 | 1.006 | 0.198 | 5160.5 | 0.290071141 |
| T2-Pre | Label_4_vs_0 | 0.985 | 0.963 | 1.008 | 0.206 | 2244.5 | 0.182832328 |
| T1-Ratio | Label_1_vs_0 | 217.816 | 46.439 | 1021.651 | 0 | 1500 | ***p*＜**0.001 |
| T1-Ratio | Label_2_vs_0 | 2086.358 | 494.316 | 8805.888 | 0 | 2947 | ***p*＜**0.001 |
| T1-Ratio | Label_3_vs_0 | 562.557 | 114.388 | 2766.651 | 0 | 1093 | ***p*＜**0.001 |
| T1-Ratio | Label_4_vs_0 | 235.775 | 34.653 | 1604.182 | 0 | 445 | ***p*＜**0.001 |
| T2-Ratio | Label_1_vs_0 | 9.97 | 3.34 | 29.764 | 0 | 4266 | 0.204453479 |
| T2-Ratio | Label_2_vs_0 | 12.185 | 4.472 | 33.196 | 0 | 8836 | 0.000168042 |
| T2-Ratio | Label_3_vs_0 | 29.792 | 8.936 | 99.331 | 0 | 2781 | 3.16E-06 |
| T2-Ratio | Label_4_vs_0 | 4.02 | 0.707 | 22.839 | 0.117 | 1666 | 0.297438193 |

Note. Luminal A group was presented as lable 0， Luminal B group was presented as lable 1，HER2-enriched group was presented as lable 2, TN group was presented as lable 3, The normal control group was represented as lable 4.

Table 4 ANOVA analysis for characteristic parameters of SyMRI.

| Variable | F-statistic | p-value |
| --- | --- | --- |
| T1-Pre | 3.871345545 | 0.004198466 |
| T2-Pre | 15.64350523 | 5.50E-12 |
| PD-Pre | 10.40381655 | 4.60E-08 |
| T1-Gd | 7.302413083 | 1.06E-05 |
| T2-Gd | 28.13667919 | 7.49E-21 |
| PD-Gd | 11.69176968 | 4.89E-09 |
| T1-Delta_ | 6.12861449 | 8.30E-05 |
| T2-Delta_ | 3.540229293 | 0.007386641 |
| PD-Delta_ | 1.396996663 | 0.234019226 |
| T1-Ratio | 109.2016798 | 9.13E-65 |
| T2-Ratio | 12.56584519 | 1.08E-09 |
| PD-Ratio | 142.4929311 | 2.66E-78 |

Table 5 Summary of all characteristic parameters of SyMRI,DCE-MRI and DWI.

|  | Overall | Luminal A | Luminal B | HER2  enriched | TN | Nomal | F-statistic | p-value |
| --- | --- | --- | --- | --- | --- | --- | --- | --- |
| Age | 46.76 ± 12.76 | 52.65 ± 10.49 | 53.42 ± 11.77 | 50.10 ± 10.93 | 55.83 ± 10.86 | 35.76 ± 6.20 | 7.268234329 | 1.12E-05 |
| ADC-Tumor | 1.10 ± 0.23 | 0.94 ± 0.18 | 1.00 ± 0.19 | 1.05 ± 0.19 | 0.95 ± 0.13 | 1.30 ± 0.14 | 90.57649979 | 2.43E-56 |
| T1-Gd | 534.33 ± 119.99 | 583.83 ± 99.97 | 553.25 ± 119.83 | 519.01 ± 93.41 | 553.40 ± 86.48 | 501.17 ± 130.37 | 3.871345545 | 0.004198466 |
| T2-Gd | 65.13 ± 11.60 | 56.40 ± 10.87 | 62.08 ± 7.98 | 64.80 ± 7.42 | 64.71 ± 9.55 | 71.38 ± 12.95 | 15.64350523 | 5.50E-12 |
| PD-Gd | 80.00 ± 17.37 | 73.34 ± 8.85 | 76.56 ± 13.53 | 79.40 ± 14.48 | 73.66 ± 10.95 | 86.84 ± 21.91 | 10.40381655 | 4.60E-08 |
| T1-Ratio | 0.38 ± 0.24 | 0.42 ± 0.13 | 0.53 ± 0.14 | 0.52 ± 0.15 | 0.51 ± 0.15 | 0.16 ± 0.21 | 109.2016798 | 9.13E-65 |
| PD-Ratio | 0.16 ± 0.43 | 0.42 ± 0.30 | 0.38 ± 0.28 | 0.43 ± 0.28 | 0.36 ± 0.23 | -0.27 ± 0.30 | 142.4929311 | 2.66E-78 |
| Menopause  0/1 | 0: 179 (39.60%); 1: 273 (60.40%) | 0: 35 (58.33%); 1: 25 (41.67%) | 0: 88 (59.06%); 1: 61 (40.94%) | 0: 33 (55.93%); 1: 26 (44.07%) | 0: 17 (70.83%); 1: 7 (29.17%) | 0: 6 (3.75%); 1: 154 (96.25%) | 12.59787795 | 1.01E-09 |
| BiRADS | 2: 1 (0.22%); 3: 118 (26.11%); 4: 50 (11.06%); 5: 133 (29.42%); 6: 141 (31.19%); 7: 9 (1.99%) | 3: 5 (8.33%); 4: 5 (8.33%); 5: 24 (40.00%); 6: 26 (43.33%) | 2: 1 (0.67%); 3: 1 (0.67%); 4: 5 (3.36%); 5: 63 (42.28%); 6: 73 (48.99%); 7: 6 (4.03%) | 3: 1 (1.69%); 4: 2 (3.39%); 5: 27 (45.76%); 6: 28 (47.46%); 7: 1 (1.69%) | 3: 1 (4.17%); 5: 9 (37.50%); 6: 12 (50.00%); 7: 2 (8.33%) | 3: 110 (68.75%); 4: 38 (23.75%); 5: 10 (6.25%); 6: 2 (1.25%) | 201.7999099 | 1.05E-98 |
| maoci | 0.0: 278 (61.50%); 1.0: 173 (38.27%) | 0.0: 16 (26.67%); 1.0: 44 (73.33%) | 0.0: 59 (39.60%); 1.0: 89 (59.73%) | 0.0: 37 (62.71%); 1.0: 22 (37.29%) | 0.0: 14 (58.33%); 1.0: 10 (41.67%) | 0.0: 152 (95.00%); 1.0: 8 (5.00%) | 48.22221331 | 1.06E-33 |
| TIC | 1: 95 (21.02%); 2: 290 (64.16%); 3: 67 (14.82%) | 1: 4 (6.67%); 2: 36 (60.00%); 3: 20 (33.33%) | 1: 4 (2.68%); 2: 115 (77.18%); 3: 30 (20.13%) | 1: 2 (3.39%); 2: 47 (79.66%); 3: 10 (16.95%) | 2: 22 (91.67%); 3: 2 (8.33%) | 1: 85 (53.12%); 2: 70 (43.75%); 3: 5 (3.12%) | 48.23630432 | 1.01E-33 |
